# Supplementary material
Source: publisher site journal article supplement (https://www.dovepress.com/article/546808)
Supplement: Supplementary file 1 [file 546808%20Revised%20%252509Supplementary_Material.docx]

Supplementary Material

**Unveiling the Role of ZBED4 in Hepatocellular Carcinoma: Evidence From the Pan-cancer Analysis and Multiple Databases**

Jing Ding1, Xia Zou1, Xuefeng Huang1,2, Le Yu1, HuangM Hong1, TongY Lin1*

*** Correspondence:** Tongyu Lin, Department of Medical Oncology, Sichuan Clinical Research Center for Cancer, Sichuan Cancer Hospital & Institute, Sichuan Cancer Center, University of Electronic Science and Technology of China, No.55, Section 4, Renmin South Road, Chengdu, Sichuan, People’s Republic of China. Email: linty@sysucc.org.cn. Tel:+86-28-85420656.

# Supplementary Figures and Tables

## Supplementary Figures


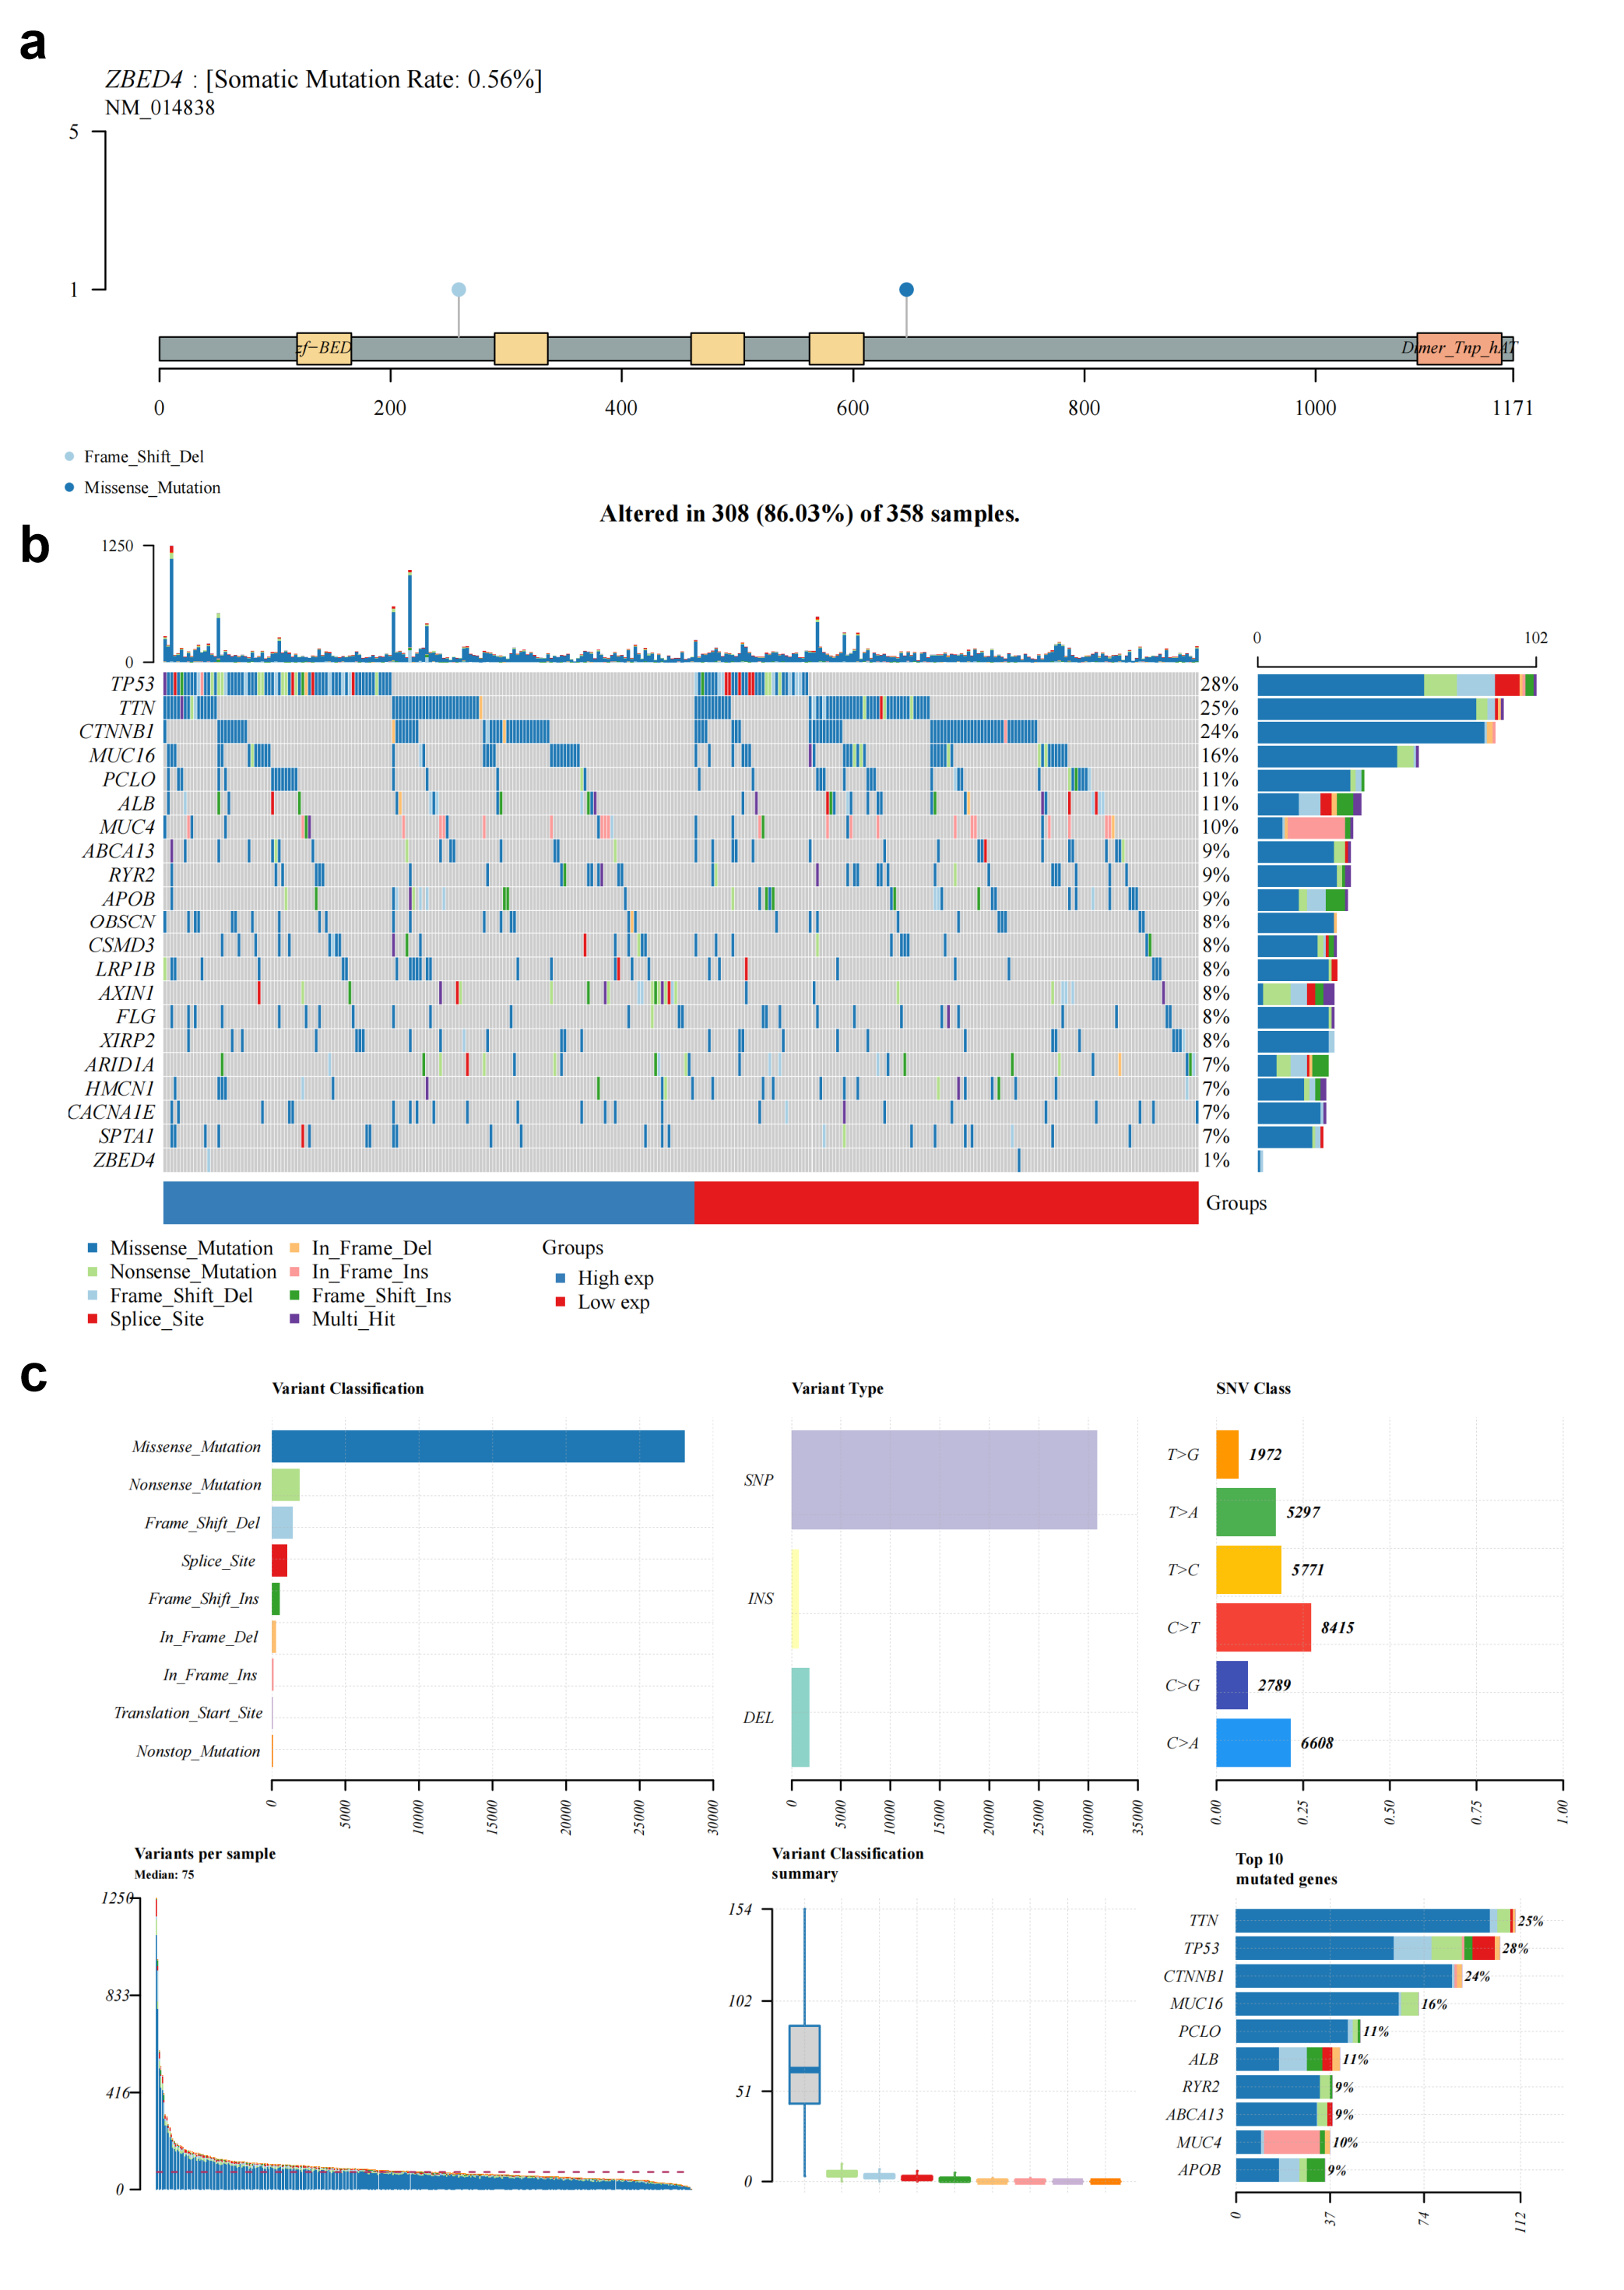


**Supplementary Figure 1. Genetic Mutation Landscape of ZBED4 in LIHC**

**a)** The lollipop plot presents the somatic mutation rate, mutation distribution and protein domains for ZBED4 in LIHC. **b)** The landscape of mutation profiles in LIHC samples with high- and low-ZBED4 expression is presented in a waterfall plot, which displays the mutation information of each gene in each sample. The plot is arranged in descending order of mutation burden, with the samples on the left and the genes on the right. Different colors with specific annotations at the bottom indicate the various mutation types. The barplot above the legend shows the number of mutations per sample. **c)** The cohort summary plot illustrates the distribution of variants according to variant classification, type, and SNV class. The bottom part indicats the mutation load for each sample, variant classification type and a stacked barplot showing the top ten mutated genes. LIHC, liver hepatocellular carcinoma; SNV, single nucleotide variant


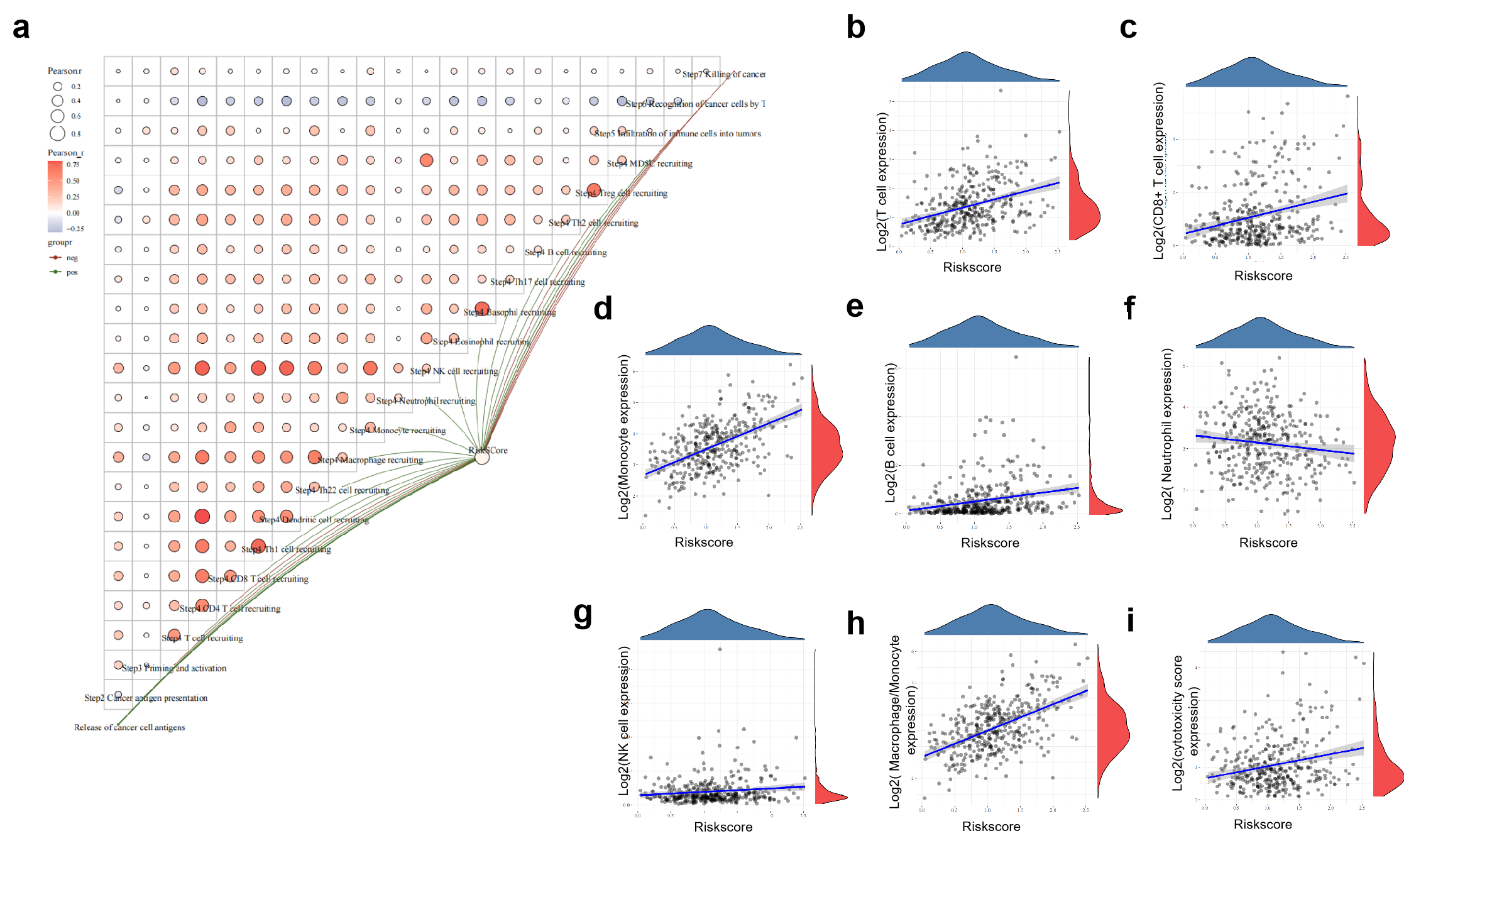


**Supplementary Figure 2. The Correlation Between Risk Score of Multi-gene Prognostic Signature and Immune**

**a)** A butterfly diagram constructed to visually represent the relationship between the model risk score and immune score using the TIP system, along with the correlation analysis of immune scoring itself. **b-g)** The correlation between risk score of multi-gene prognostic signature and immune score of **b)** T cell, **c)** CD8+ T cell, **d)** B cell, **e)** monocyte, **f)** myeloid dendritic cell, **g)** neutrophil. **h-i)** The correlation between risk score and **h)** macrophage/monocyte expression rate, **i)** cytotoxicity score expression.


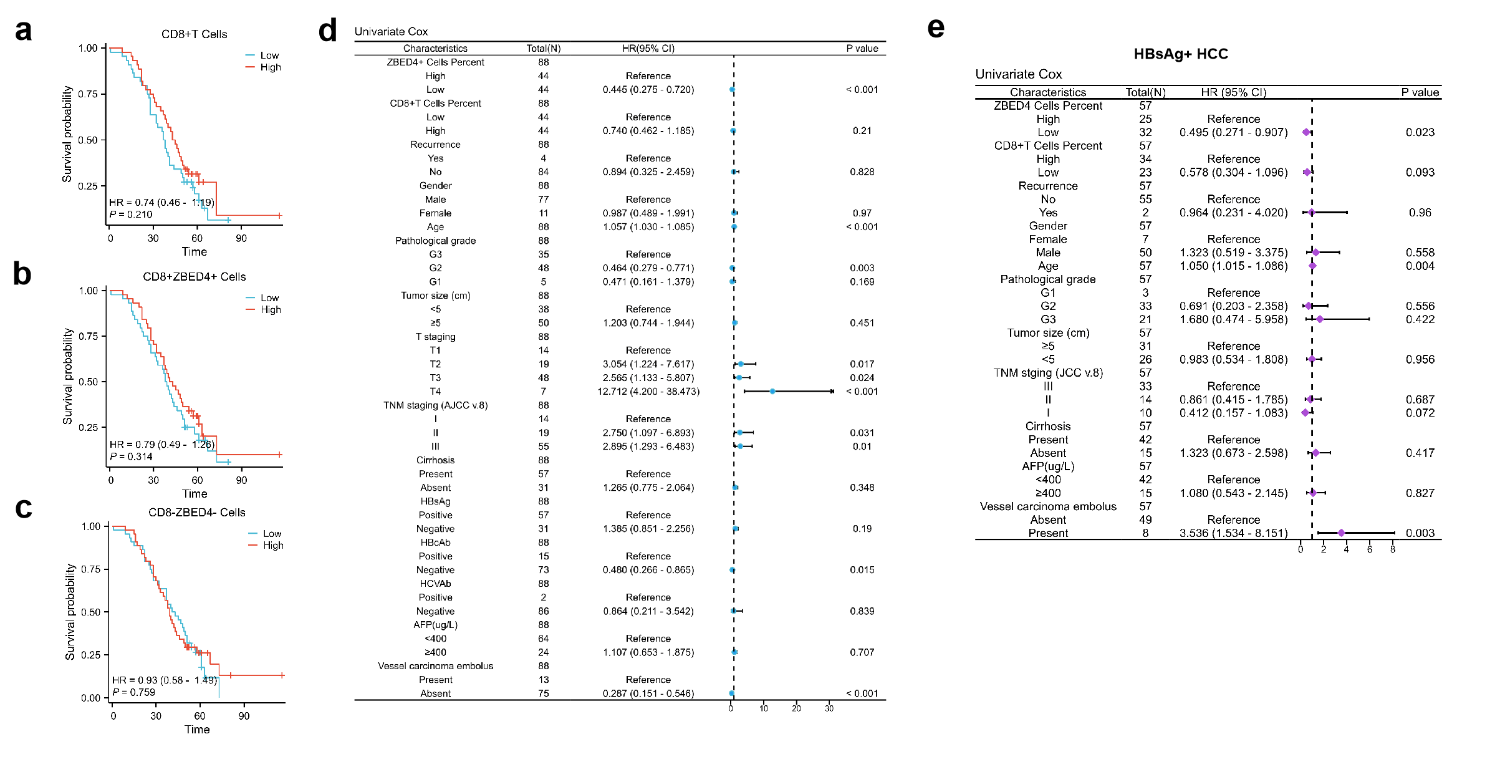


**Supplementary Figure 3. The correlation between ZBED4 protein Expression, CD8+T Cell Infiltration and Prognosis in HCC TMA by Multiplex Immunofluorescence.**

**a-c)** Survival curves between high and low positive rate of CD8+T cells, CD8+ZBED4+ cells and CD8-ZBED4- cells. **d)** The association of ZBED4, clinicpathological fators and OS in HCC patients by univariate Cox regression analysis. **e)** The association of ZBED4, clinicpathological fators and OS in the HBsAg-positive subgroup by univariate Cox regression analysis. *p < 0.05, **p < 0.01, ***p < 0.001. HCC, hepatocellular carcinoma. TMA, tissue microarray. OS, overall survival.

## Supplementary Tables

# Supplementary Table 1. The clinical and pathological characteristics between the high-ZBED4 and low-ZBED4 group of HCC.

| **Characteristics** | **ZBED4-High** | **ZBED4-Low** | **P value** |
| --- | --- | --- | --- |
| n | 44 | 44 |  |
| CD8+T Cells Percent, median (IQR) | 1.59 (0.65, 2.72) | 2.48 (1.39, 7.05) | 0.027 |
| Recurrence, n (%) |  |  | 0.609 |
| No | 41 (46.6%) | 43 (48.9%) |  |
| Yes | 3 (3.4%) | 1 (1.1%) |  |
| Gender, n (%) |  |  | 0.334 |
| Male | 40 (45.5%) | 37 (42%) |  |
| Female | 4 (4.5%) | 7 (8%) |  |
| Age, mean ± sd | 55.07 ± 10.60 | 49.84 ± 9.91 | 0.019 |
| Pathological grade, n (%) |  |  | 0.384 |
| G3 | 17 (19.3%) | 18 (20.5%) |  |
| G2 | 23 (26.1%) | 25 (28.4%) |  |
| G1 | 4 (4.5%) | 1 (1.1%) |  |
| Tumor size (cm), n (%) |  |  | 0.667 |
| ≥5 | 26 (29.5%) | 24 (27.3%) |  |
| <5 | 18 (20.5%) | 20 (22.7%) |  |
| T staging, n (%) |  |  | 0.624 |
| T4 | 4 (4.5%) | 3 (3.4%) |  |
| T3 | 24 (27.3%) | 24 (27.3%) |  |
| T2 | 11 (12.5%) | 8 (9.1%) |  |
| T1 | 5 (5.7%) | 9 (10.2%) |  |
| TNM staging (AJCC v.8), n (%) |  |  | 0.837 |
| III | 28 (31.8%) | 27 (30.7%) |  |
| II | 10 (11.4%) | 9 (10.2%) |  |
| I | 6 (6.8%) | 8 (9.1%) |  |
| Cirrhosis, n (%) |  |  | 0.265 |
| Absent | 13 (14.8%) | 18 (20.5%) |  |
| Present | 31 (35.2%) | 26 (29.5%) |  |
| HBsAg, n (%) |  |  | 0.118 |
| Negative | 19 (21.6%) | 12 (13.6%) |  |
| Positive | 25 (28.4%) | 32 (36.4%) |  |
| HBcAb, n (%) |  |  | 0.156 |
| Negative | 34 (38.6%) | 39 (44.3%) |  |
| Positive | 10 (11.4%) | 5 (5.7%) |  |
| HCVAb, n (%) |  |  | 0.474 |
| Negative | 44 (50%) | 42 (47.7%) |  |
| Positive | 0 (0%) | 2 (2.3%) |  |
| AFP(ug/L), n (%) |  |  | 0.017 |
| ≥400 | 17 (19.3%) | 7 (8.0%) |  |
| <400 | 27 (30.7%) | 37 (42.0%) |  |
| Vessel carcinoma embolus, n (%) |  |  | 0.367 |
| Present | 5 (5.7%) | 8 (9.1%) |  |
| Absent | 39 (44.3%) | 36 (40.9%) |  |

# Abbreviations: HCC, hepatocellular carcinoma; HBsAg, Hepatitis B surface antigen; HBcAb, Hepatitis B core antibody; HCVAb, Hepatitis C Virus Antibody; AFP, Alpha-Fetal Protein.

# Supplementary Table 2. Correlation of clinicopathological factors and ZBED4 expression in 88 patients with HCC by logistic regression

| **Variable** |  | **ZBED4 expression**  **(High vs. Low)** | | |
| --- | --- | --- | --- | --- |
| **OR** | **95%CI** | **P value** |
| Age(years) |  | 1.07 | 1.02-1.12 | 0.009 |
| Cirrhosis | Present vs Absent | 0.21 | 0.06-0.68 | 0.009 |
| HBsAg | Positive vs Negative | 4.03 | 1.27-12.83 | 0.018 |
| AFP(ug/L) | ≥400 vs <400 | 0.20 | 0.06-0.68 | 0.010 |

# Abbreviations: HCC, hepatocellular carcinoma; HBsAg, Hepatitis B surface antigen; AFP, Alpha-Fetal Protein.

# Supplementary Table 3. The clinical and pathological characteristics between the high-ZBED4 and low-ZBED4 group of HBsAg-positive HCC.

| **Characteristics** | **ZBED4-High** | **ZBED4-Low** | **P value** |
| --- | --- | --- | --- |
| n | 25 | 32 |  |
| CD8+T Cells Percent, median (IQR) | 1.7782 (0.86219, 6.0499) | 3.2368 (1.6454, 7.0501) | 0.233 |
| Recurrence, n (%) |  |  | 1.000 |
| No | 24 (42.1%) | 31 (54.4%) |  |
| Yes | 1 (1.8%) | 1 (1.8%) |  |
| Gender, n (%) |  |  | 0.643 |
| Male | 23 (40.4%) | 27 (47.4%) |  |
| Female | 2 (3.5%) | 5 (8.8%) |  |
| Age, mean ± sd | 53.56 ± 10.94 | 50.188 ± 9.1031 | 0.209 |
| Pathological grade, n (%) |  |  | 0.125 |
| G1 | 3 (5.3%) | 0 (0%) |  |
| G2 | 14 (24.6%) | 19 (33.3%) |  |
| G3 | 8 (14%) | 13 (22.8%) |  |
| Tumor size (cm), n (%) |  |  | 0.749 |
| ≥5 | 13 (22.8%) | 18 (31.6%) |  |
| <5 | 12 (21.1%) | 14 (24.6%) |  |
| T staging, n (%) |  |  | 0.792 |
| T1 | 3 (5.3%) | 6 (10.5%) |  |
| T2 | 7 (12.3%) | 6 (10.5%) |  |
| T3 | 13 (22.8%) | 18 (31.6%) |  |
| T4 | 2 (3.5%) | 2 (3.5%) |  |
| TNM stging (JCC v.8), n (%) |  |  | 0.951 |
| I | 4 (7%) | 6 (10.5%) |  |
| II | 6 (10.5%) | 8 (14%) |  |
| III | 15 (26.3%) | 18 (31.6%) |  |
| Cirrhosis, n (%) |  |  | 0.726 |
| Present | 19 (33.3%) | 23 (40.4%) |  |
| Absent | 6 (10.5%) | 9 (15.8%) |  |
| AFP(ug/L), n (%) |  |  | 0.142 |
| <400 | 16 (28.1%) | 26 (45.6%) |  |
| ≥400 | 9 (15.8%) | 6 (10.5%) |  |
| Vessel carcinoma embolus, n (%) |  |  | 0.995 |
| Absent | 22 (38.6%) | 27 (47.4%) |  |
| Present | 3 (5.3%) | 5 (8.8%) |  |

# Abbreviations: HCC, hepatocellular carcinoma; HBsAg, Hepatitis B surface antigen; AFP, Alpha-Fetal Protein.
